# Supplementary material for: An effective multisource informed consent procedure for research and clinical practice: an observational study of patient understanding and awareness of their roles as research stakeholders in a cancer biobank
Source: PubMed Central journal article supplement (PMC3734192; doi:10.1186/1472-6939-14-30), 2013-07-30
Supplement: 1472-6939-14-30-S2.pdf [file 1472-6939-14-30-S2.pdf]

|                                                                                  |                                                                                             |                                                                                                                                        |
|----------------------------------------------------------------------------------|---------------------------------------------------------------------------------------------|----------------------------------------------------------------------------------------------------------------------------------------|
|  | <p align="center"><b>Centro di Riferimento Oncologico<br/>National Cancer Institute</b></p> | <p align="center"><b>President</b><br/>Dr. Paolo De Paoli<br/><b>Managers</b><br/>Dr. Vincenzo Canzonieri<br/>Dr. Agostino Steffan</p> |
| <p align="center"><b>CRO-BIOBANK</b></p>                                         |                                                                                             |                                                                                                                                        |

**COGNITIVE QUESTIONNAIRE ON CRO-BIOBANK**

**Dear Sir or Madam, since we requested your contribution to the CRO-BIOBANK, regardless of whether or not you have given us your consent, we kindly invite you to answer this questionnaire. The compilation will take only a few minutes; you can answer by marking with a cross (eg. ☒) the response that you consider most appropriate. Thank you for your kind contribution.**

- What is your gender?  
 Male     Female
- What is your Nationality? (Please specify) .....
- How old are you? (Please specify) |\_|\_|
- What is your marital status?  
 Single     Married/cohabiting     Separated/divorced     Widowed
- What is your educational level?  
 Elementary school                       Middle School  
 High school                                       University
- Did you donate biological material (blood, tissue, etc.) to CRO-BIOBANK?  
 NO     YES
- Would you briefly describe why you donated or refused to donate biological material to CRO-BIOBANK? (Please specify).....
- Were you aware of the existence of BIOBANKS before today?  
 NO (Skip to the questions on the reverse side of this sheet)     YES

If YES, what was the source of information? (multiple answers are allowed)

|                                                   | <u>NO</u>                | <u>YES</u>               | <u>If YES, rating</u>            |                                       |                                     |
|---------------------------------------------------|--------------------------|--------------------------|----------------------------------|---------------------------------------|-------------------------------------|
| <input type="checkbox"/> Television               | <input type="checkbox"/> | <input type="checkbox"/> | <input type="checkbox"/> Unclear | <input type="checkbox"/> Fairly clear | <input type="checkbox"/> Very clear |
| <input type="checkbox"/> Newspapers/<br>magazines | <input type="checkbox"/> | <input type="checkbox"/> | <input type="checkbox"/> Unclear | <input type="checkbox"/> Fairly clear | <input type="checkbox"/> Very clear |
| <input type="checkbox"/> Internet                 | <input type="checkbox"/> | <input type="checkbox"/> | <input type="checkbox"/> Unclear | <input type="checkbox"/> Fairly clear | <input type="checkbox"/> Very clear |
| <input type="checkbox"/> CRO                      | <input type="checkbox"/> | <input type="checkbox"/> | <input type="checkbox"/> Unclear | <input type="checkbox"/> Fairly clear | <input type="checkbox"/> Very clear |
| <input type="checkbox"/> CRO-brochure             | <input type="checkbox"/> | <input type="checkbox"/> | <input type="checkbox"/> Unclear | <input type="checkbox"/> Fairly clear | <input type="checkbox"/> Very clear |
| <input type="checkbox"/> CRO-poster               | <input type="checkbox"/> | <input type="checkbox"/> | <input type="checkbox"/> Unclear | <input type="checkbox"/> Fairly clear | <input type="checkbox"/> Very clear |
| <input type="checkbox"/> CRO news                 | <input type="checkbox"/> | <input type="checkbox"/> | <input type="checkbox"/> Unclear | <input type="checkbox"/> Fairly clear | <input type="checkbox"/> Very clear |
| <input type="checkbox"/> Other hospitals          | <input type="checkbox"/> | <input type="checkbox"/> | <input type="checkbox"/> Unclear | <input type="checkbox"/> Fairly clear | <input type="checkbox"/> Very clear |

9. With this questionnaire, you have been handed a flyer, did you read it?

NO       YES

If YES, how would you rate it?       Unclear       Fairly clear       Very clear

10. In this hospital, who gave you information about CRO-BIOBANK and how would you rate this information?

|                                                  | <u>NO</u>                | <u>YES</u>               | <u>If YES, rating</u>            |                                       |                                     |
|--------------------------------------------------|--------------------------|--------------------------|----------------------------------|---------------------------------------|-------------------------------------|
| <input checked="" type="radio"/> Physician       | <input type="checkbox"/> | <input type="checkbox"/> | <input type="checkbox"/> Unclear | <input type="checkbox"/> Fairly clear | <input type="checkbox"/> Very clear |
| <input checked="" type="radio"/> Nurse/Biologist | <input type="checkbox"/> | <input type="checkbox"/> | <input type="checkbox"/> Unclear | <input type="checkbox"/> Fairly clear | <input type="checkbox"/> Very clear |

11. Would you like to receive additional information about CRO-BIOBANK?

NO       YES

If YES, by which sources? (multiple answers are allowed)

|                                                                  |                                                 |
|------------------------------------------------------------------|-------------------------------------------------|
| <input type="checkbox"/> CRO health personnel                    | <input type="checkbox"/> CRO news               |
| <input type="checkbox"/> My family doctor                        | <input type="checkbox"/> More detailed brochure |
| <input type="checkbox"/> Video clips in the waiting rooms at CRO | <input type="checkbox"/> Website                |

12. How would you rate the Informed consent form, explaining the use and preservation modalities of the biological material?

Unclear       Fairly clear       Very clear

13. Do you think that the interview was conducted in a setting (ward, ambulatory) in respect of your privacy?

NO       YES

14. If you have donated samples to the CRO-BIOBANK, do you feel that the procedure was conducted in respect of your will/availability?

NO       YES

**Below you will be asked some questions related to the purpose of biobanks (select only one answer for each question).**

15. Do you know what is stored in a biobank?:

Clinical records       Blood and other biological material       Scientific books

16. Do you know the end use of CRO-BIOBANK material?

Cancer research and care       Informative purpose       Economic purpose

17. Do you think that biobanks are useful to the health of the community?

NO       YES

\*\*\*\*

**Thank you for taking the time to fill out this questionnaire and for your contribution to the progress of the CRO-BIOBANK.**

**To ensure the anonymity of your responses, close the questionnaire in the white envelope that was given to you and deliver it to the Department or the ambulatory nurse.**
